# Supplementary material for: Study about Doping Ion La3+ onto Surface of Pyrolusite Ore for Removing Simultaneously Both Fluoride and Phosphate from Wastewater
Source: Hindawi journal article supplement (doi:10.1155/2017/4893835), 2017-01-01
Supplement: f1 [file 4893835.f1.pdf]

**Figure S1.** (A) - Percent of fluoride and phosphate removal from aqueous solution by different molar ratios between  $\text{La}^{3+}$  and  $\text{Fe}^{3+}$ ; LDPO 0 - without  $\text{La}^{3+}$  doped onto surface of the LDPO; LDPO 1:3, LDPO 1:2, LDPO 1:1, LDPO 2:1, and LDPO 3:1 - ratios of molar between  $\text{La}^{3+}$  and  $\text{Fe}^{3+}$  onto surface of the LDPO, respectively. (B) - pH of solution simultaneously containing phosphate and fluoride treated by various ratios of molar La between  $\text{La}^{3+}$  and  $\text{Fe}^{3+}$  onto surface of the LDPO.

**Figure S2.** Desorption of phosphate and fluoride from the surface of LDPO as a function of pH.

**Figure S3.** Phosphate and fluoride removal efficiency in wastewater samples under different sorbent dosage.

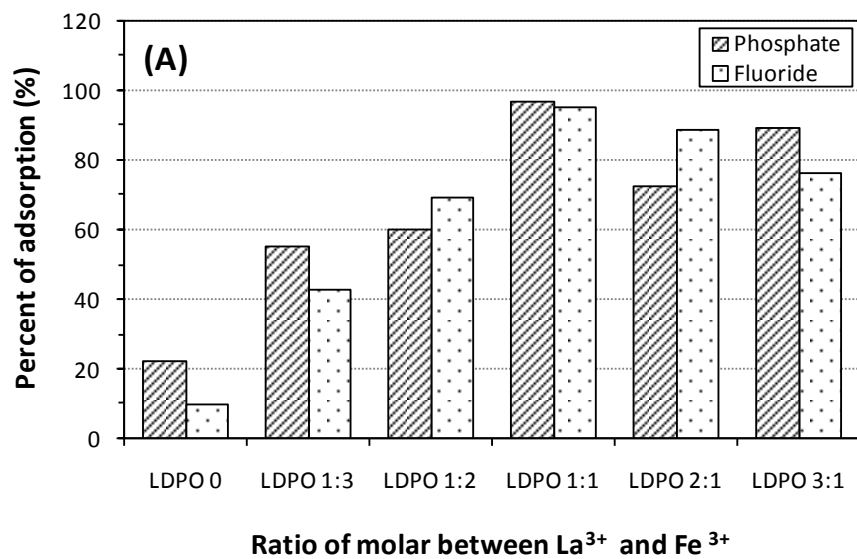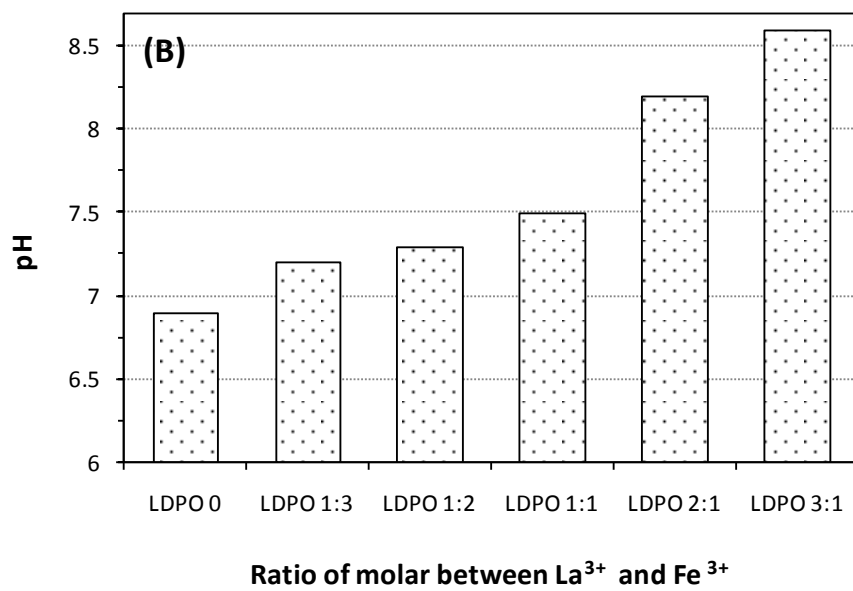

**Fig. S1.**

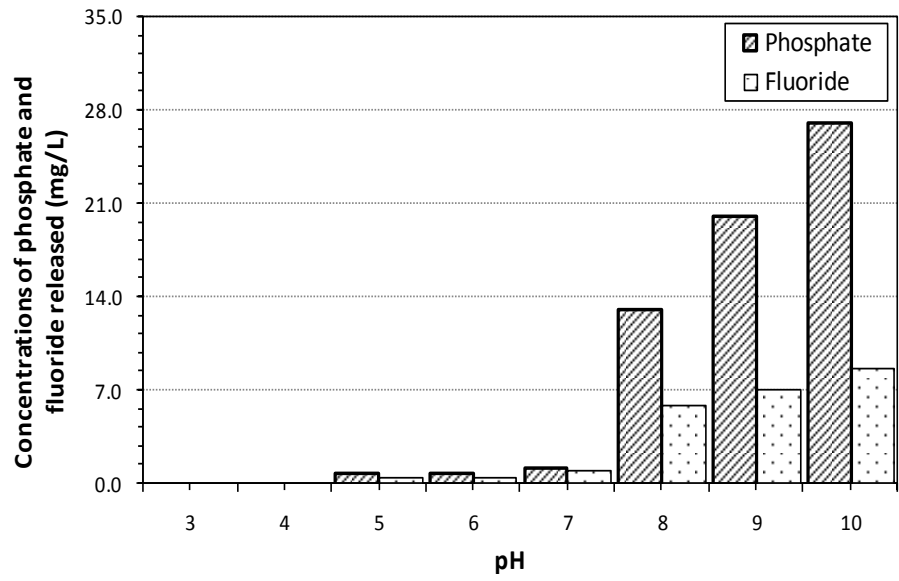

**Fig. S2.**

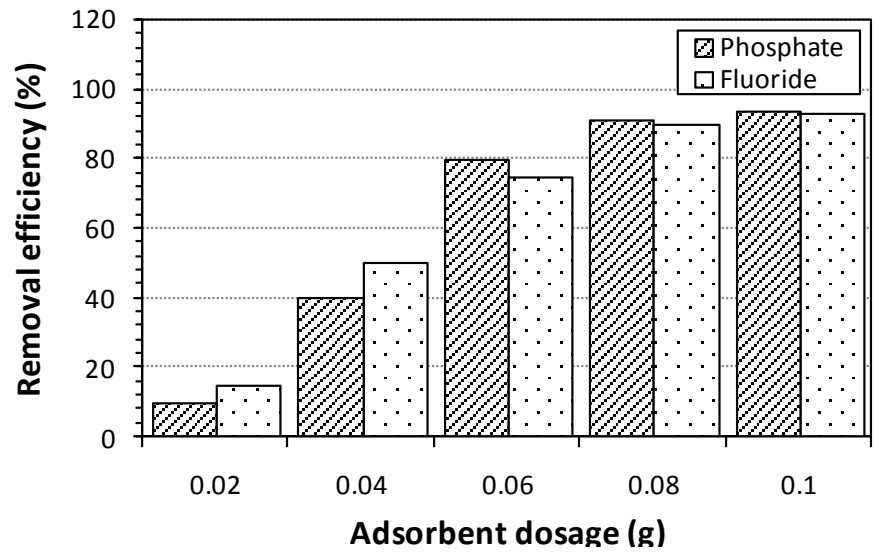

**Fig. S3.**

Table S1. Composition of elements in natural Pyrolusite ore and La-doped Pyrolusite ore

|                         | C     | O     | Na   | Al   | Si   | K    | Mn    | Fe   | Cu   | La    | Total |
|-------------------------|-------|-------|------|------|------|------|-------|------|------|-------|-------|
| Natural Pyrolusite ore  | 16.48 | 37.56 | 0.62 | 2.98 | 0.25 | 0.10 | 29.36 | 8.42 | 3.98 | 0.00  | 100   |
| La-doped Pyrolusite ore | 9.2   | 35.18 | 0.48 | 1.53 | 0.4  | 0.15 | 22.6  | 7.48 | 3.17 | 19.81 | 100   |

Table S2. Wastewater composition in Superphosphate Fertilizer factory

| Component            | Phosphate | Arsenic total | Fluoride | Sulfate | Silicate | Chloride | pH  |
|----------------------|-----------|---------------|----------|---------|----------|----------|-----|
| Concentration (mg/L) | 13.72     | 0.75          | 4.68     | 10.28   | 3.42     | 45.19    | 6.8 |
